# Supplementary material for: A Simple Method to Decode the Complete 18-5.8-28S rRNA Repeated Units of Green Algae by Genome Skimming
Source: PubMed Central journal article supplement (PMC5713310; doi:10.3390/ijms18112341), 2017-11-06
Supplement: ijms-18-02341-s001.pdf [file ijms-18-02341-s001.pdf]

Figure S1\_BLAST hints for three green algae 18-5.8-28S rRNA

BLAST hint for *Haematococcus pluvialis* 18-5.8-28S rRNA sequence

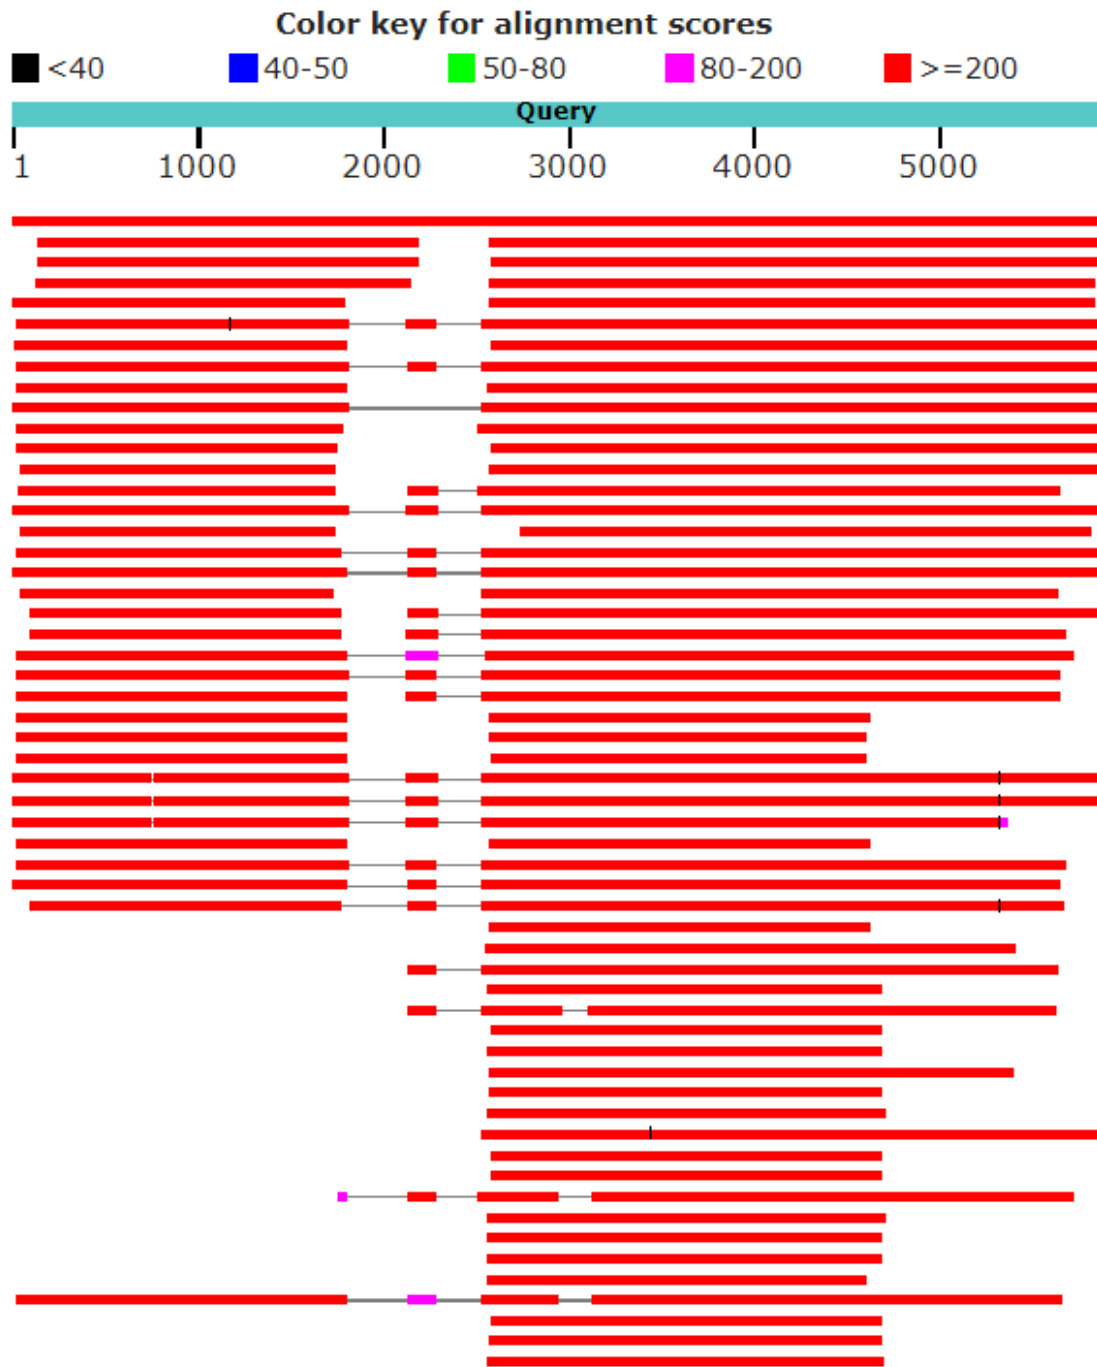

## Sequence alignment result for *Haematococcus pluvialis* 18-5.8-28S rRNA sequence

Haematococcus pluvialis strain KMMCC 1354 18S ribosomal RNA gene, partial sequence  
 Sequence ID: [JQ315539.1](#) Length: 2040 Number of Matches: 1

Range 1: 1 to 2040 [GenBank](#) [Graphics](#) ▼ Next Match ▲ Previous Match

| Score           | Expect                                                        | Identities          | Gaps       | Strand    |
|-----------------|---------------------------------------------------------------|---------------------|------------|-----------|
| 3738 bits(2024) | 0.0                                                           | 2036/2041(99%)      | 3/2041(0%) | Plus/Plus |
| Query 142       | ACCG-TAGTAATTCTAGAGCTAATACGTGCG-TATATCCC                      | ACTTCTGGAAGGGACGTAT | 199        |           |
| Sbjct 1         | ACCGCTAGT-ATTCTAGAGCTAATACGTGCGCTATATCCC                      | ACTTCTGGAAGGGACGTAT | 59         |           |
| Query 200       | TTATTAGATAAAAAGGCCAGCCGGGCTTGCCCGACCTATGGCGAATCATGATAACTTCACG | 259                 |            |           |
| Sbjct 60        | TTATTAGATAAAAAGGCCAGCCGGGCTTGCCCGACCTATGGCGAATCATGATAACTTCACG | 119                 |            |           |
| Query 260       | AATCGCACGGCCTTGCGCCGGCGATGTTTCATTCAAATTTCTGCCTATCAACTTTCGAT   | 319                 |            |           |
| Sbjct 120       | AATCGCACGGCCTTGCGCCGGCGATGTTTCATTCAAATTTCTGCCTATCAACTTTCGAT   | 179                 |            |           |
| Query 320       | GGTAGGATAGAGGCTACCATGGTGGTAACGGGTGACGGAGGATTAGGGTTCGATTCCGG   | 379                 |            |           |
| Sbjct 180       | GGTAGGATAGAGGCTACCATGGTGGTAACGGGTGACGGAGGATTAGGGTTCGATTCCGG   | 239                 |            |           |
| Query 380       | AGAGGGAGCCTGAGAAACGGCTACCACATCCAAGGAAGGCAGCAGGCGCGCAAATTACCC  | 439                 |            |           |
| Sbjct 240       | AGAGGGAGCCTGAGAAACGGCTACCACATCCAAGGAAGGCAGCAGGCGCGCAAATTACCC  | 299                 |            |           |
| Query 440       | AATCCCGACACGGGGAGGTAGTGACAATAAATAACAATACCGGGCATCAATGTCTGGTAA  | 499                 |            |           |
| Sbjct 300       | AATCCCGACACGGGGAGGTAGTGACAATAAATAACAATACCGGGCATCAATGTCTGGTAA  | 359                 |            |           |
| Query 500       | TTGGAATGAGAACAATTTAAATCCCTTAAACGAGTATCCATTGGAGGGCAAGTCTGGTGCC | 559                 |            |           |
| Sbjct 360       | TTGGAATGAGAACAATTTAAATCCCTTAAACGAGTATCCATTGGAGGGCAAGTCTGGTGCC | 419                 |            |           |
| Query 560       | AGCAGCCGCGGTAATTCAGCTCCAATAGCGTATATTTAAGTTGTTGCAGTTAAAAAGCT   | 619                 |            |           |
| Sbjct 420       | AGCAGCCGCGGTAATTCAGCTCCAATAGCGTATATTTAAGTTGTTGCAGTTAAAAAGCT   | 479                 |            |           |
| Query 620       | CGTAGTTGGATTTTCGGGTGGGTTCCAGCGGTCTGCCTCTGGTATGTA              | 679                 |            |           |
| Sbjct 480       | CGTAGTTGGATTTTCGGGTGGGTTCCAGCGGTCTGCCTCTGGTATGTA              | 539                 |            |           |
| Query 680       | CCTTTCTGCCGGGACGTGTTCTGGGCTTCATTGTCCGGGACTCGAATTCGGCGAGGAT    | 739                 |            |           |
| Sbjct 540       | CCTTTCTGCCGGGACGTGTTCTGGGCTTCATTGTCCGGGACTCGAATTCGGCGAGGAT    | 599                 |            |           |
| Query 740       | ACTTTGAGTAAAACAGCGTGTTCAAAGCAAGCCTACGCTCTGAATGCATTAGCATGGAAT  | 799                 |            |           |
| Sbjct 600       | ACTTTGAGTAAAACAGCGTGTTCAAAGCAAGCCTACGCTCTGAATGCATTAGCATGGAAT  | 659                 |            |           |
| Query 800       | ATCACGATAGGACTCTGGCCTATCTTGTGGTCTGTAGGACCGGAGTAATGATTAAGAGG   | 859                 |            |           |
| Sbjct 660       | ATCACGATAGGACTCTGGCCTATCTTGTGGTCTGTAGGACCGGAGTAATGATTAAGAGG   | 719                 |            |           |
| Query 860       | GACAGTCGGGGGCATTTCGATATTTTCATTGTCAGAGGTGAAATTC                | 919                 |            |           |
| Sbjct 720       | GACAGTCGGGGGCATTTCGATATTTTCATTGTCAGAGGTGAAATTC                | 779                 |            |           |

BLAST hint for *Aegagropila linnaei* 18-5.8-28S rRNA sequence

---

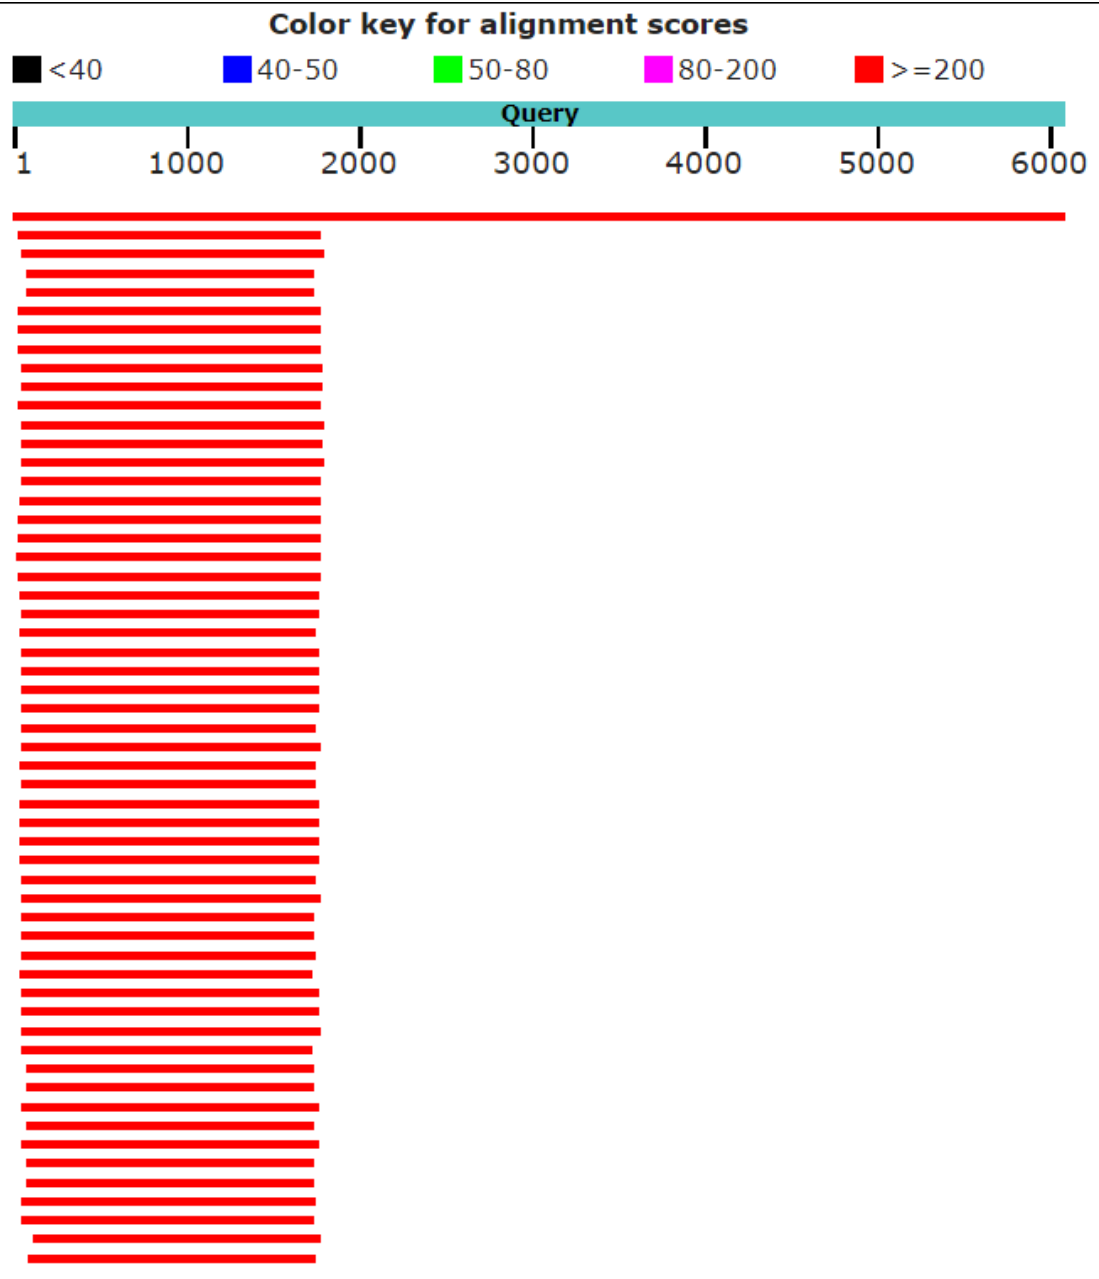

## Sequence alignment result for *Aegagropila linnaei* 18-5.8-28S rRNA sequence

Aegagropila linnaei gene for 18S ribosomal RNA, partial sequence, Lake Akan

Sequence ID: [AB062698.1](#) Length: 1738 Number of Matches: 1

▶ [See 3 more title\(s\)](#)

Range 1: 1 to 1738 [GenBank](#) [Graphics](#)

▼ Next Match ▲ Previous Match

| Score           | Expect                                                        | Identities     | Gaps       | Strand    |
|-----------------|---------------------------------------------------------------|----------------|------------|-----------|
| 3205 bits(1735) | 0.0                                                           | 1738/1739(99%) | 1/1739(0%) | Plus/Plus |
| Query 20        | TCGTGATGCTTGTCTCAAAGATTAAGCCATGCATGTGTAGGTATAACCGATTATACCG    |                |            | 79        |
| Sbjct 1         | TCGTGATGCTTGTCTCAAAGATTAAGCCATGCATGTGTAGGTATAACCGATTATACCG    |                |            | 60        |
| Query 80        | GAAAAC TGCGAATGGCTCGGTAATCAGTTATAGTTTATTTGATAGTGCTCACTACTCGG  |                |            | 139       |
| Sbjct 61        | GAAAAC TGCGAATGGCTCGGTAATCAGTTATAGTTTATTTGATAGTGCTCACTACTCGG  |                |            | 120       |
| Query 140       | ATAACCGTAGTAACGCTAGAGCTAATACGTGCGTAAATCCCGACTCTAGGAAGGGACGTA  |                |            | 199       |
| Sbjct 121       | ATAACCGTAGTAACGCTAGAGCTAATACGTGCGTAAATCCCGACTCTAGGAAGGGACGTA  |                |            | 180       |
| Query 200       | TTTATTAGATAAAAAGGCCGACCGGTTTCCCGATCTGCGCTGAATCATGGTAACTTCACG  |                |            | 259       |
| Sbjct 181       | TTTATTAGATAAAAAGGCCGACCGGTTTCCCGATCTGCGCTGAATCATGGTAACTTCACG  |                |            | 240       |
| Query 260       | GATTGCATGGCCTTCGTGCCAGCGACGTGTCATTCAAGTTTCTGCCCCATCATGGTTTCG  |                |            | 319       |
| Sbjct 241       | GATTGCATGGCCTTCGTGCCAGCGACGTGTCATTCAAGTTTCTGCCCCATCATGGTTTCG  |                |            | 300       |
| Query 320       | ACTGTAATGTATTGGATTACAGTGCCGATAACGGGTAGCGGAGGATTAGGGTTCGATTCC  |                |            | 379       |
| Sbjct 301       | ACTGTAATGTATTGGATTACAGTGCCGATAACGGGTAGCGGAGGATTAGGGTTCGATTCC  |                |            | 360       |
| Query 380       | GGAGAGGGCGCCTGAGAAATGGCGACCACATCCAAGGAAGGCAGCAGGCGCGCAAAATTAC |                |            | 439       |
| Sbjct 361       | GGAGAGGGCGCCTGAGAAATGGCGACCACATCCAAGGAAGGCAGCAGGCGCGCAAAATTAC |                |            | 420       |
| Query 440       | CCAATCCCAACTCAGGGAGGTAGTGACAAGAAATAACAATGCGGAGCCATAGGTTCTGCA  |                |            | 499       |
| Sbjct 421       | CCAATCCCAACTCAGGGAGGTAGTGACAAGAAATAACAATGCGGAGCCATAGGTTCTGCA  |                |            | 480       |
| Query 500       | ATTGGAATGAGTACAATTTAAACCACTTAACGAGTACCTATTGGAGGGCAAGTCTGGTGC  |                |            | 559       |
| Sbjct 481       | ATTGGAATGAGTACAATTTAAACCACTTAACGAGTACCTATTGGAGGGCAAGTCTGGTGC  |                |            | 540       |
| Query 560       | CAGCAGCCGCGGTAATCCAGTCCAATAGCGTATATGTAAGTTGTTGCGATTAAAAAGC    |                |            | 619       |
| Sbjct 541       | CAGCAGCCGCGGTAATCCAGTCCAATAGCGTATATGTAAGTTGTTGCGATTAAAAAGC    |                |            | 600       |
| Query 620       | CCGTAGCTGAACCTCGGGCAGCCCGACGGTCCCGCCTTACGGTGAGTACTGTCCTGGGCT  |                |            | 679       |
| Sbjct 601       | CCGTAGCTGAACCTCGGGCAGCCCGACGGTCCCGCCTTACGGTGAGTACTGTCCTGGGCT  |                |            | 660       |

BLAST hint for *Chlorella ellipsoidea* 18-5.8-28S rRNA sequence

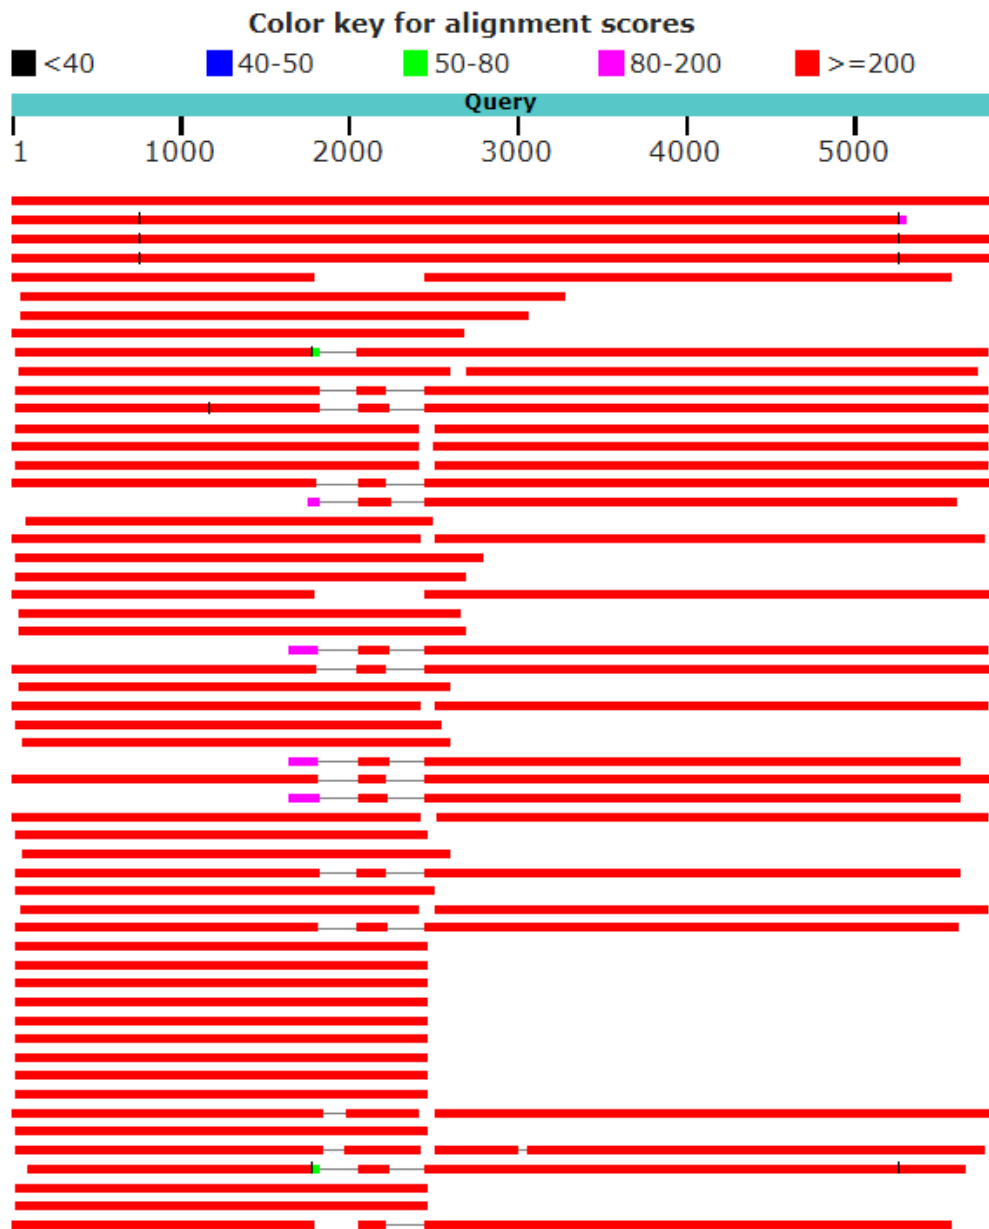

## Sequence alignment result for *Chlorella ellipsoidea* 18-5.8-28S rRNA sequence

Chlorella sorokiniana 18S rRNA gene, strain Prag A14

Sequence ID: [X74001.1](#) Length: 1797 Number of Matches: 1

Range 1: 2 to 1796 [GenBank](#) [Graphics](#) ▼ Next Match ▲ Previous Match

| Score           | Expect                                                        | Identities     | Gaps       | Strand    |
|-----------------|---------------------------------------------------------------|----------------|------------|-----------|
| 3299 bits(1786) | 0.0                                                           | 1792/1795(99%) | 0/1795(0%) | Plus/Plus |
| Query 1         | ACCTGGTTGATCCTGCCAGTAGTCATATGCTTGTCTCAAAGATTAAGCCATGCATGTCTA  |                |            | 60        |
| Sbjct 2         | ACCTGGTTGATCCTGCCAGTAGTCATATGCTTGTCTCAAAGATTAAGCCATGCATGTCTA  |                |            | 61        |
| Query 61        | AGTATAAACTGCTTTATACTGTGAAACTGCGAATGGCTCATTAAATCAGTTATAGTTTAT  |                |            | 120       |
| Sbjct 62        | AGTATAAACTGCTTTATACTGTGAAACTGCGAATGGCTCATTAAATCAGTTATAGTTTAT  |                |            | 121       |
| Query 121       | TTGATGGTACCTACTACTCGGATACCCGTAAGTAAATCTAGAGCTAATACGTGCGTAAATC |                |            | 180       |
| Sbjct 122       | TTGATGGTACCTACTACTCGGATACCCGTAAGTAAATCTAGAGCTAATACGTGCGTAAATC |                |            | 181       |
| Query 181       | CCGACTTCTGGAAGGGACGTATTTATTAGATAAAAAGGCCGACCGGGCTCTGCCCGACTCG |                |            | 240       |
| Sbjct 182       | CCGACTTCTGGAAGGGACGTATTTATTAGATAAAAAGGCCGACCGGGCTCTGCCCGACTCG |                |            | 241       |
| Query 241       | CGGTGAATCATGATAAATTACGAATCGCATGGCCTCGTGCCGGCGATGTTTCATTCAAAA  |                |            | 300       |
| Sbjct 242       | CGGTGAATCATGATAAATTACGAATCGCATGGCCTCGTGCCGGCGATGTTTCATTCAAAA  |                |            | 301       |
| Query 301       | TTTCTGCCCTATCAACTTTTCGATGGTAGGATAGAGGCCTACCATGGTGGTAACGGGTGAC |                |            | 360       |
| Sbjct 302       | TTTCTGCCCTATCAACTTTTCGATGGTAGGATAGAGGCCTACCATGGTGGTAACGGGTGAC |                |            | 361       |
| Query 361       | GGAGGATTAGGGTTCGATTCGAGAGGGAGCCTGAGAAACGGCTACCACATCCAAGGAA    |                |            | 420       |
| Sbjct 362       | GGAGGATTAGGGTTCGATTCGAGAGGGAGCCTGAGAAACGGCTACCACATCCAAGGAA    |                |            | 421       |
| Query 421       | GGCAGCAGGCGCGCAAATTACCCAATCCTGACACAGGGAGGTAGTGACAATAAATAACAA  |                |            | 480       |
| Sbjct 422       | GGCAGCAGGCGCGCAAATTACCCAATCCTGACACAGGGAGGTAGTGACAATAAATAACAA  |                |            | 481       |
| Query 481       | TACTGGGCCTTTTTCAGGTCTGGTAATTGGAATGAGTACAATCTAAACCCCTTAACGAGGA |                |            | 540       |
| Sbjct 482       | TACTGGGCCTTTTTCAGGTCTGGTAATTGGAATGAGTACAATCTAAACCCCTTAACGAGGA |                |            | 541       |
| Query 541       | TCAATTGGAGGGCAAGTCTGGTGCCAGCAGCCGCGTAATCCAGCTCCAATAGCGTATA    |                |            | 600       |
| Sbjct 542       | TCAATTGGAGGGCAAGTCTGGTGCCAGCAGCCGCGTAATCCAGCTCCAATAGCGTATA    |                |            | 601       |
| Query 601       | TTTAAGTTGCTGCAGTTAAAAAGCTCGTAGTTGGATTTTCGGGTGGGGCCTGCCGGTCCGC |                |            | 660       |
| Sbjct 602       | TTTAAGTTGCTGCAGTTAAAAAGCTCGTAGTTGGATTTTCGGGTGGGGCCTGCCGGTCCGC |                |            | 661       |
| Query 661       | CGTTTCGGTGTGCACTGGCAGGGCCACCTTGTTCGGGGGACGGGCTCCTGGGCTTCAC    |                |            | 720       |
| Sbjct 662       | CGTTTCGGTGTGCACTGGCAGGGCCACCTTGTTCGGGGGACGGGCTCCTGGGCTTCAC    |                |            | 721       |
